# Supplementary material for: Different therapeutic approaches on quality of life in patients with inflammatory bowel disease
Source: PubMed Central journal article supplement (PMC4271410; doi:10.1186/s12876-014-0199-5), 2014-11-25
Supplement: 12876_2014_199_MOESM2_ESM.pdf [file 12876_2014_199_MOESM2_ESM.pdf]

## Additional file 2

### Scale of marriage, employment and economic burden

#### Marriage:

1. After being diagnosed of IBD, to what extent has the disease affected your marriage or love life?

①Not at all ②Slightly ③Moderately ④Quite a bit ⑤Extremely

2. After being diagnosed of IBD, what do you think about your marital happiness?

①Poor ②Fair ③Good ④Very good ⑤Excellent

#### Employment:

3. After being diagnosed of IBD, to what extent has the disease affected your employment?

①Not at all ②Slightly ③Moderately ④Quite a bit ⑤Extremely

4. After being diagnosed of IBD, to what extent has the disease reduced your work time?

①Significantly ②Moderately ③Not at all

5. Did you lose your job because of IBD?

①Yes ②No

Economic burden:

6. After being diagnosed of IBD, to what extent has the disease laid economic burden on you or your family?

- ①Not at all ②Slightly ③Moderately ④Quite heavy ⑤Extremely heavy
