# Supplementary material for: Different therapeutic approaches on quality of life in patients with inflammatory bowel disease
Source: Springer Nature journal article supplement (doi:10.1186/s12876-014-0199-5), 2014-11-24
Supplement: MOESM1 [file 9738026]

## Additional file 1

### Supplementary tables

**Supplementary Table 1. Details of MCIBDQ and Chinese version of SF-36**

| Dimension          | Number of items | Score range | Items distribution                |
|--------------------|-----------------|-------------|-----------------------------------|
| <b>MCIBDQ</b>      |                 |             |                                   |
| Bowel symptoms     | 10              | 10-70       | 1+5+9+13+17+20+22+24+26+29        |
| Systemic symptoms  | 5               | 5-35        | 2+6+10+14+18                      |
| Emotional function | 12              | 12-84       | 3+7+11+15+19+21+23+25+27+30+31+32 |
| Social function    | 5               | 5-35        | 4+8+12+16+28                      |
| <b>SF-36</b>       |                 |             |                                   |
| PF                 | 10              | 10-30       | 3a+3b+3c+3d+3e+3f+3g+3h+3i+3j     |
| RP                 | 4               | 4-8         | 4a+4b+4c+4d                       |
| BP                 | 2               | 2-11        | 7+8                               |
| GH                 | 5               | 5-25        | 1+11a+11b+11c+11d                 |
| VT                 | 4               | 4-24        | 9a+9e+9g+9i                       |
| SF                 | 2               | 2-10        | 6+10                              |
| RE                 | 3               | 3-6         | 5a+5b+5c                          |
| MH                 | 5               | 5-30        | 9b+9c+9d+9f+9h                    |
| Health transition  | 1               | 1-5         | 2                                 |

PF: Physical functioning, RP: Role limitations due to physical health problems, BP: Bodily pain, GH: General health perception, VT: Vitality, SF: Social functioning, RE: Role limitations due to emotional problems, MH: Mental health.
