# Supplementary material for: Different therapeutic approaches on quality of life in patients with inflammatory bowel disease
Source: Springer Nature journal article supplement (doi:10.1186/s12876-014-0199-5), 2014-11-24
Supplement: MOESM4 [file 9738026]

## Additional file 4

**Supplementary Table 2. Comparison of HRQOL scores among different treatment groups**

| Treatment group           | Non- IFX treatment group (level 1-3) |             |              |                 | IFX treatment group (level 4)      |                                    |                  | Paired groups         |        |
|---------------------------|--------------------------------------|-------------|--------------|-----------------|------------------------------------|------------------------------------|------------------|-----------------------|--------|
|                           | 1<br>(N=15)                          | 2<br>(N=21) | 3<br>(N=27)  | Total<br>(N=63) | <4<br>times <sup>a</sup><br>(N=17) | ≥<br>4times <sup>a</sup><br>(N=24) | Total<br>(N=41)  | Non-<br>IFX<br>(N=32) | IFX    |
| <b>DAI</b>                |                                      |             |              |                 |                                    |                                    |                  |                       |        |
| Before <sup>b</sup>       | 6.47                                 | 8.38        | 7.65         | 7.61            | 6.35                               | 7.06                               | 6.77             | 7.77                  | 7.92   |
| After <sup>b</sup>        | 1.53                                 | 1.17        | 1.52         | 1.40            | 2.09                               | 0.42                               | 1.11             | 1.42                  | 1.39   |
| Variation <sup>b</sup>    | -4.93                                | -7.21       | -6.13        | -6.21           | -4.26                              | -6.65                              | -5.66            | -6.34                 | -6.53  |
| Pvalue <sup>c</sup>       | 0.577                                | 0.194       | 0.655        | 0.528           | 0.081                              |                                    | <b>&lt;0.001</b> | 0.702                 |        |
| <b>MCIBDQ</b>             |                                      |             |              |                 |                                    |                                    |                  |                       |        |
| <b>Bowel symptoms</b>     |                                      |             |              |                 |                                    |                                    |                  |                       |        |
| Before <sup>b</sup>       | 43.80                                | 44.17       | 47.25        | 45.37           | 41.76                              | 41.25                              | 41.46            | 47.85                 | 39.28  |
| After <sup>b</sup>        | 56.16                                | 60.70       | 57.69        | 58.32           | 56.27                              | 63.71                              | 60.63            | 58.64                 | 59.93  |
| Variation <sup>b</sup>    | 12.30                                | 16.37       | 10.39        | 12.83           | 14.51                              | 22.46                              | 19.16            | 10.56                 | 20.65  |
| Pvalue <sup>c</sup>       | 0.114                                | 0.469       | <b>0.019</b> | <b>0.029</b>    | 0.060                              |                                    | <b>&lt;0.001</b> | <b>0.007</b>          |        |
| <b>Systemic symptoms</b>  |                                      |             |              |                 |                                    |                                    |                  |                       |        |
| Before <sup>b</sup>       | 19.60                                | 19.05       | 18.81        | 19.08           | 15.12                              | 18.17                              | 16.90            | 19.72                 | 15.53  |
| After <sup>b</sup>        | 24.36                                | 25.87       | 22.85        | 24.21           | 24.18                              | 28.63                              | 26.78            | 24.78                 | 26.59  |
| Variation <sup>b</sup>    | 4.50                                 | 6.82        | 4.15         | 5.15            | 9.06                               | 10.46                              | 9.88             | 5.06                  | 11.06  |
| Pvalue <sup>c</sup>       | <b>0.046</b>                         | 0.189       | <b>0.008</b> | <b>0.006</b>    | 0.615                              |                                    | <b>&lt;0.001</b> | <b>0.007</b>          |        |
| <b>Emotional function</b> |                                      |             |              |                 |                                    |                                    |                  |                       |        |
| Before <sup>b</sup>       | 50.00                                | 52.10       | 53.50        | 52.18           | 43.66                              | 48.50                              | 46.49            | 56.34                 | 44.38  |
| After <sup>b</sup>        | 59.73                                | 67.84       | 64.30        | 64.47           | 60.35                              | 72.88                              | 67.68            | 67.09                 | 66.72  |
| Variation <sup>b</sup>    | 9.51                                 | 15.74       | 10.73        | 12.18           | 16.69                              | 24.38                              | 21.19            | 10.74                 | 22.34  |
| Pvalue <sup>c</sup>       | <b>0.028</b>                         | 0.221       | <b>0.022</b> | <b>0.010</b>    | 0.154                              |                                    | <b>&lt;0.001</b> | <b>0.015</b>          |        |
| <b>Social function</b>    |                                      |             |              |                 |                                    |                                    |                  |                       |        |
| Before <sup>b</sup>       | 21.77                                | 20.76       | 22.03        | 21.54           | 17.42                              | 19.70                              | 18.79            | 22.98                 | 17.40  |
| After <sup>b</sup>        | 26.86                                | 28.55       | 26.23        | 27.16           | 23.89                              | 30.65                              | 27.94            | 27.45                 | 27.67  |
| Variation <sup>b</sup>    | 5.23                                 | 7.79        | 4.29         | 5.71            | 6.47                               | 10.95                              | 9.16             | 4.47                  | 10.27  |
| Pvalue <sup>c</sup>       | 0.196                                | 0.640       | 0.054        | 0.086           | 0.192                              |                                    | <b>&lt;0.001</b> | <b>0.024</b>          |        |
| <b>Total MCIBDQ</b>       |                                      |             |              |                 |                                    |                                    |                  |                       |        |
| Before <sup>b</sup>       | 135.17                               | 136.08      | 141.58       | 138.17          | 119.81                             | 127.61                             | 124.49           | 146.89                | 117.51 |
| After <sup>b</sup>        | 167.10                               | 181.77      | 171.07       | 173.67          | 164.18                             | 195.85                             | 183.19           | 177.09                | 181.05 |
| Variation <sup>b</sup>    | 31.55                                | 45.24       | 29.56        | 35.25           | 44.37                              | 68.24                              | 58.69            | 29.55                 | 63.54  |
| Pvalue <sup>c</sup>       | 0.066                                | 0.303       | <b>0.019</b> | <b>0.015</b>    | 0.127                              |                                    | <b>&lt;0.001</b> | <b>0.004</b>          |        |
| <b>Total SF-36</b>        |                                      |             |              |                 |                                    |                                    |                  |                       |        |
| Before <sup>b</sup>       | 88.53                                | 89.26       | 95.76        | 92.03           | 78.80                              | 88.54                              | 84.50            | 95.20                 | 79.58  |

|                             |        |        |              |              |              |        |                  |        |              |
|-----------------------------|--------|--------|--------------|--------------|--------------|--------|------------------|--------|--------------|
| After <sup>b</sup>          | 104.21 | 110.32 | 101.45       | 104.95       | 103.25       | 120.39 | 113.80           | 105.21 | 113.14       |
| Variation <sup>b</sup>      | 14.34  | 21.66  | 6.20         | 12.94        | 22.22        | 31.85  | 28.14            | 10.45  | 32.40        |
| <i>P</i> value <sup>c</sup> | 0.084  | 0.389  | <b>0.001</b> | <b>0.004</b> | 0.269        |        | <b>&lt;0.001</b> |        | <b>0.002</b> |
| <b>Health transition</b>    |        |        |              |              |              |        |                  |        |              |
| Before <sup>b</sup>         | 4.07   | 3.76   | 3.93         | 3.90         | 3.94         | 4.00   | 3.98             | 3.97   | 4.06         |
| After <sup>b</sup>          | 2.73   | 2.33   | 2.59         | 2.54         | 2.94         | 1.42   | 2.05             | 2.72   | 1.94         |
| Variation <sup>b</sup>      | -1.33  | -1.43  | -1.33        | -1.37        | -1.00        | -2.58  | -1.93            | -1.25  | -2.13        |
| <i>P</i> value <sup>c</sup> | 0.273  | 0.298  | 0.125        | 0.102        | <b>0.002</b> |        | <b>&lt;0.001</b> |        | 0.075        |

a, according to the times of IFX infusion till the last interview, subjects in IFX group were divided into 2 subgroups: <4 times and  $\geq 4$  times;

b, the mean scores before treatment or after treatment were calculated on all available data excluding the dropped domain scores; all the variations were defined as (score of the interview after treatment minus score of the interview before treatment) without dropped domains both before and after treatment;

c. Independent *t*-test and paired *t*-test were applied. *P* values in the groups of treatment level 1, 2 or 3 were assessed by comparing the score variance between level 1 and level 4, level 2 and level 4, and level 3 and level 4, respectively; *P* values in the total non-IFX treatment group were assessed by comparing the score variance between the total non-IFX treatment group and the total IFX treatment group; *P* values in subgroups of IFX treatment group were assessed by comparing the score variance between these two subgroups; *P* values in total IFX treatment group were assessed by comparing the score variance between score of the 2<sup>nd</sup> interview and score of the 1<sup>st</sup> interview; *P* values in paired groups were assessed by comparing the score variance between these two paired groups.

The data of missing responses were excluded according to setting of PASW Statistics 18.0. The *P* values in bold were those with significance at the 0.05 level (2-tailed).
